# Supplementary material for: Generation of the iPSC line CUIMCi003-A derived from a patient with severe early onset obesity
Source: PubMed Central journal article supplement — Stem Cell Res. Author manuscript; Available in PMC 2021 Aug 5. (PMC8340056; doi:10.1016/j.scr.2021.102432), 2021-06-21
Supplement: NIHMS1722920-supplement-1.pdf [file NIHMS1722920-supplement-1.pdf]

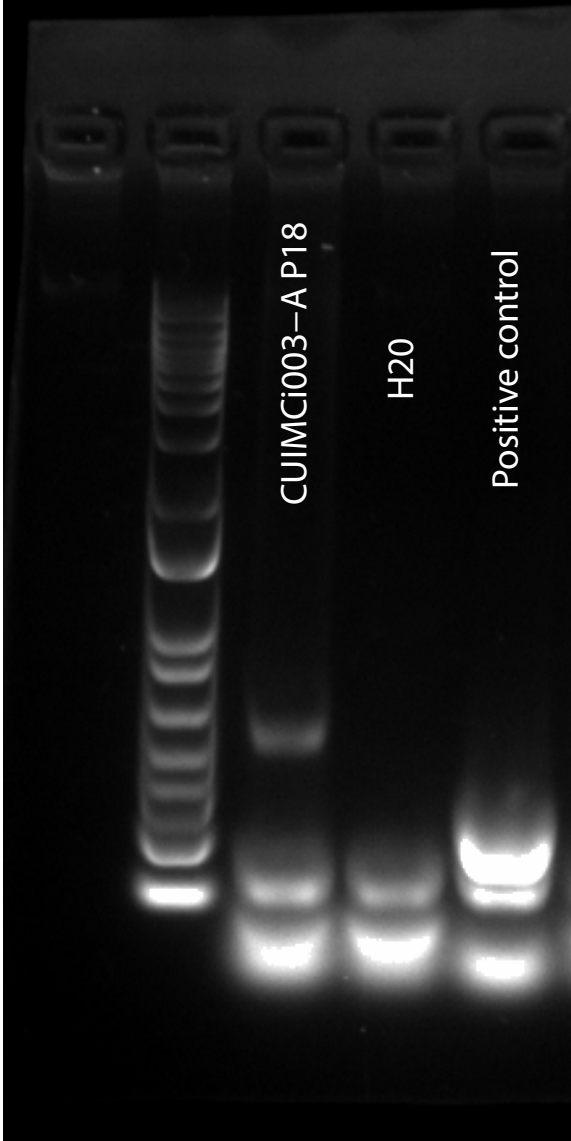

← Sample control (approx. 570bp)

← Target band (approx. 260bp): Mycoplasma +  
← Internal control (approx. 160bp)

← Primer dimers
