# Supplementary material for: Generation of the iPSC line CUIMCi003-A derived from a patient with severe early onset obesity
Source: PubMed Central journal article supplement — Stem Cell Res. Author manuscript; Available in PMC 2021 Aug 5. (PMC8340056; doi:10.1016/j.scr.2021.102432), 2021-06-21
Supplement: NIHMS1722920-supplement-2.pdf [file NIHMS1722920-supplement-2.pdf]

## Cell Line Characterization

---

Cell Line ID:  
Passage #:  
Specimen Type:  
Indication for Study:

Lab #:  
PI:  
Contact Person:  
Email:  
Address:

Test Code:                      Date Received:  
Account #:                      Date Reported:  
PO #:                              Time in Culture:

Additional copies sent to:

---

Banding Technique:              Band Resolution:  
Metaphases Counted:          Analyzed:          Karyotyped:

**RESULTS:**

**Non-clonal Aberrations:**

**INTERPRETATION:**
